# Supplementary material for: Bionic cartilage acellular matrix microspheres as a scaffold for engineering cartilage
Source: Royal Society of Chemistry journal article supplement (doi:10.1039/c8tb02999g), 2018-12-12
Supplement: c8tb02999g1.pdf [file c8tb02999g1.pdf]

## Bionic Cartilage Acellular Matrix Microspheres as scaffold for engineering cartilage

**Keyword:** microspheres, extracellular matrix, decellularization, chondrogenesis, tissue engineering

Jun Liu, Xiuyu Wang, Gonggong Lu, James Z. Tang, Yonghui Wang, Boqing Zhang, Yong Sun, Hai Lin, Qiguang Wang\*, Jie Liang, Yujiang Fan\*, Xingdong Zhang

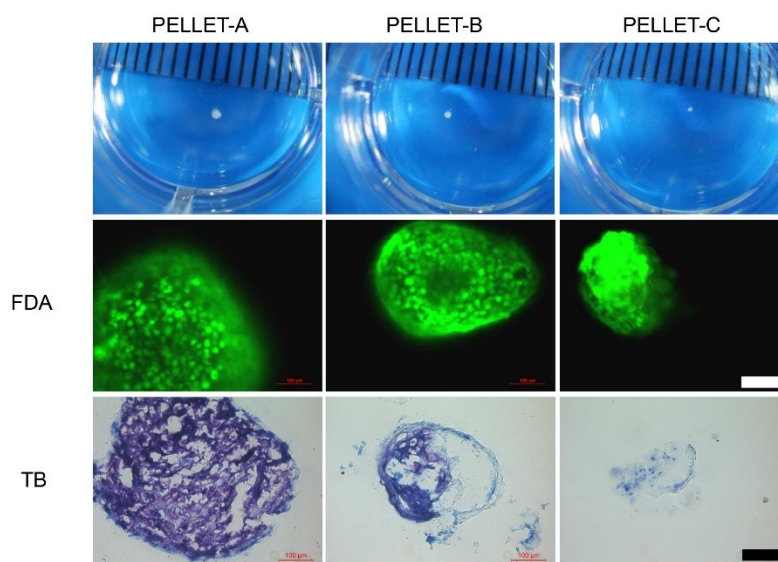

**Figure S1.** Characterizations of MSCs pellet ( $8 \times 10^4$ ) after 7 days culture in the different culture medium (A: DMEM , L-ascorbic acid 2-phosphate, L-proline, ITS+, NEAA, Dexamethasone, TGF- $\beta$ 1; B: DMEM , L-ascorbic acid 2-phosphate, L-proline, ITS+, NEAA, Dexamethasone; C: DMEM , L-ascorbic acid 2-phosphate, L-proline, ITS+, NEAA). Positive staining of Toluidine Blue can be observed in the pellets in the medium A and B. Scale bars represented 100  $\mu$ m.

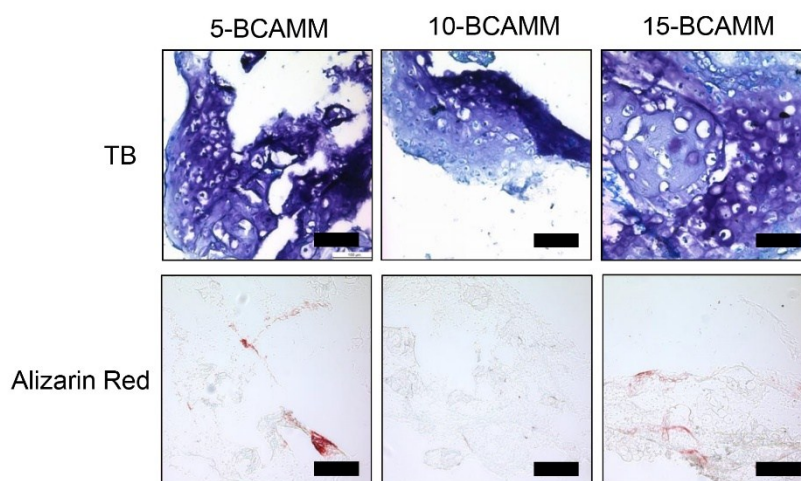

**Figure S2.** To test the chondrogenic inducing ability of BCAMM, cell density of  $1 \times 10^4$  cells/mg were experimented in the culture medium with 1% FBS and without TGF- $\beta$ 1 after 28 days. Toluidine Blue staining and Alizarin Red staining were used to characterise matrix. Scale bars represented 100  $\mu$ m.
